# Supplementary material
Source: publisher figshare collection journal article supplement (https://gsajournals.figshare.com/ndownloader/files/13477403)
Supplement: Supplementary file 1 [file 13477403]

## Sheet: Sheet1
Table S3. Primers information
Primer_name	Sequence (5'->3')	Annealing Temperature	Product length
Examining missasemblies in r6
kl5:1F	GGAGCACGATGGGACATGAA	55	279
kl5:1R	CTCCGTGAACTAACGGGTCC
kl5:5_1_2F	GCAACATGACCTCCGTTCTT	55	224
kl5:5_1_2R	GGGTTGTCCATGTGTTGGGAA
kl5:5_2F	CCCCCTAGTCAGGATGCTTT	55	315
kl5:5_2R	TAGGGCATGTCTCGCTGTTG
kl5:17F	AGGAGCCCGTAAGTAGAGTAGG	55	113
kl5:17R	GACGCATTGTCTTGGTTAGGT
kl-2:67_2F	TTGCACTTGCATCGAGGAGG	55	704
kl-2:67_2R	TAGCGAAGCAAAGCCACCAT
kl-3:3F	TACCTGGACTTATGGTGGCA	55	174
kl-3:3R	AGTTCTGCTGATGGTATTTCCC
CCY:6	ACACACCCTAGATTTTAGAGAGC	55	675
CCY:6	AAACAGCACCACTCACTCAACA
Examining new duplications
fru_YF	GGAGAAGAATGGCAGACCAC	55	183
fru_YR	GGGCAACTAAAGGTATTGCACTT
